# Supplementary material for: β-Ketoiminato-based copper(ii) complexes as CVD precursors for copper and copper oxide layer formation
Source: Royal Society of Chemistry journal article supplement (doi:10.1039/c8dt01647j), 2018-01-01
Supplement: c8dt01647j1.pdf [file c8dt01647j1.pdf]

# **Electronic Supplementary Information**

## **$\beta$ -Ketoiminato-based Copper(II) Complexes as CVD**

### **Precursors for Copper and Copper Oxide Layer**

### **Formation**

Elaheh Pousaneh<sup>a</sup>, Marcus Korb<sup>a</sup>, Volodymyr Dzhagan<sup>b,c</sup>, Marcus Weber<sup>d</sup>, Julian Noll<sup>a</sup>, Michael Mehring<sup>d</sup>, Dietrich R. T. Zahn<sup>b</sup>, Stefan. E. Schulz<sup>e,f</sup>, Heinrich Lang<sup>a\*</sup>

*a) Technische Universität Chemnitz, Faculty of Natural Sciences, Institute of Chemistry, Inorganic Chemistry, D-09107 Chemnitz, Germany*

*b) Technische Universität Chemnitz, Faculty of Natural Sciences, Institute of Physics, Semiconductor Physics, D-09107 Chemnitz, Germany*

*c) V. E. Lashkaryov Institute of Semiconductors Physics, National Academy of Sciences of Ukraine, 03028 Kyiv, Ukraine*

*d) Technische Universität Chemnitz, Faculty of Natural Sciences, Institute of Chemistry, Coordination Chemistry, D-09107 Chemnitz, Germany*

*e) Technische Universität Chemnitz, Center for Microtechnologies, D-09107 Chemnitz, Germany*

*f) Fraunhofer Institute for Electronic Nano Systems ENAS, Technologie-Campus 3, D-09126 Chemnitz, Germany*

*\*Corresponding author: Email: [heinrich.lang@chemie.tu-chemnitz.de](mailto:heinrich.lang@chemie.tu-chemnitz.de); Phone: +49 (0)371-531-21210; Fax.: +49-(0)371-531-21219*

*Received ,...*

## Content

|                                                                                           |         |
|-------------------------------------------------------------------------------------------|---------|
| Crystal and structural refinement data of <b>4a,b</b> , <b>5</b> , and <b>6</b> .....     | 3       |
| Hydrogen bridge bond pattern ( $\text{\AA}/^\circ$ ) of <b>4b</b> in the solid state..... | 4       |
| DSC traces of <b>4b,5</b> and <b>6</b> .....                                              | 4       |
| PXRD pattern of the TG residues of <b>4a</b> , <b>5</b> , and <b>6</b> .....              | 5 - 7   |
| EDX spectra of the deposited films obtained from <b>4</b> - <b>6</b> .....                | 8 - 11  |
| XPS spectra of the deposits obtained from <b>4a</b> and <b>5</b> .....                    | 11 - 17 |
| PXRD pattern of the deposits obtained from Layers A, D, H, and F.....                     | 17 - 18 |

**Table S1.** Crystal and structural refinement data of **4a, b, 5** and **6**.

| Complexes                                                         | <b>4a</b>                                                                     | <b>4b</b>                                                                     | <b>5</b>                                                                      | <b>6</b>                                                                      |
|-------------------------------------------------------------------|-------------------------------------------------------------------------------|-------------------------------------------------------------------------------|-------------------------------------------------------------------------------|-------------------------------------------------------------------------------|
| Empirical formula                                                 | C <sub>22</sub> H <sub>40</sub> Cu <sub>2</sub> N <sub>4</sub> O <sub>6</sub> | C <sub>32</sub> H <sub>46</sub> Cu <sub>2</sub> N <sub>4</sub> O <sub>7</sub> | C <sub>20</sub> H <sub>34</sub> Cu <sub>2</sub> N <sub>2</sub> O <sub>8</sub> | C <sub>26</sub> H <sub>50</sub> Cu <sub>2</sub> N <sub>4</sub> O <sub>7</sub> |
| Formula mass (g/mol)                                              | 583.66                                                                        | 725.81                                                                        | 557.57                                                                        | 657.78                                                                        |
| Crystal system                                                    | Monoclinic                                                                    | Monoclinic                                                                    | Monoclinic                                                                    | Monoclinic                                                                    |
| Space group                                                       | <i>P2<sub>1</sub>/n</i>                                                       | <i>P2<sub>1</sub>/n</i>                                                       | <i>P2<sub>1</sub>/c</i>                                                       | <i>C2/c</i>                                                                   |
| <i>a</i> (Å)                                                      | 11.0854(10)                                                                   | 12.9343(7)                                                                    | 8.8928(3)                                                                     | 22.4102(19)                                                                   |
| <i>b</i> (Å)                                                      | 10.0289(5)                                                                    | 9.8945(4)                                                                     | 7.2198(2)                                                                     | 12.7485(9)                                                                    |
| <i>c</i> (Å)                                                      | 11.5267(10)                                                                   | 13.0557(6)                                                                    | 18.5441(6)                                                                    | 11.2535(8)                                                                    |
| $\beta$ (°)                                                       | 99.229(8)                                                                     | 92.231(4)                                                                     | 91.554(3)                                                                     | 94.524(7)                                                                     |
| <i>V</i> (Å <sup>3</sup> )                                        | 1264.89(17)                                                                   | 1669.58(14)                                                                   | 1190.17(6)                                                                    | 3205.1(4)                                                                     |
| <i>Z</i>                                                          | 2                                                                             | 2                                                                             | 2                                                                             | 4                                                                             |
| <i>D</i> <sub>calc</sub> (Mg·m <sup>-3</sup> )                    | 1.532                                                                         | 1.444                                                                         | 1.556                                                                         | 1.363                                                                         |
| Wavelength (Å)                                                    | 0.71073                                                                       | 0.71073                                                                       | 0.71073                                                                       | 0.71073                                                                       |
| Temperature (K)                                                   | 115.00(10)                                                                    | 115.00(10)                                                                    | 115.5(4)                                                                      | 116(1)                                                                        |
| Absorption coefficient (mm <sup>-1</sup> )                        | 1.725                                                                         | 1.325                                                                         | 1.833                                                                         | 1.372                                                                         |
| <i>F</i> (000)                                                    | 612                                                                           | 760                                                                           | 580                                                                           | 1392                                                                          |
| Reflections collected                                             | 4887                                                                          | 6711                                                                          | 4581                                                                          | 10414                                                                         |
| Reflections unique / <i>R</i> <sub>int</sub> <sup>a)</sup>        | 2221/0.0314                                                                   | 2940 / 0.0274                                                                 | 2093/ 0.0245                                                                  | 2816/0.0750                                                                   |
| Goodness-of-fit on <i>F</i> <sup>2</sup> <sup>b)</sup>            | 1.040                                                                         | 1.021                                                                         | 1.072                                                                         | 0.957                                                                         |
| Data / restraints / parameters                                    | 2221 / 0 / 159                                                                | 2940 / 2 / 210                                                                | 2093 / 0 / 149                                                                | 2816 / 2 / 236                                                                |
| $\theta$ range for data collection (°)                            | 3.119 to 24.995                                                               | 2.995 to 25.000                                                               | 3.132 to 24.997                                                               | 3.168 to 24.996                                                               |
| Limiting indices                                                  | -10 ≤ <i>h</i> ≤ 13,<br>-7 ≤ <i>k</i> ≤ 11,<br>-13 ≤ <i>l</i> ≤ 10            | -15 ≤ <i>h</i> ≤ 12,<br>-11 ≤ <i>k</i> ≤ 10,<br>-15 ≤ <i>l</i> ≤ 12           | -10 ≤ <i>h</i> ≤ 10,<br>-7 ≤ <i>k</i> ≤ 8,<br>-22 ≤ <i>l</i> ≤ 20             | -26 ≤ <i>h</i> ≤ 26,<br>-15 ≤ <i>k</i> ≤ 14,<br>-13 ≤ <i>l</i> ≤ 13           |
| Final <i>R</i> indices [ <i>I</i> > 2σ( <i>I</i> )] <sup>c)</sup> | <i>R</i> <sub>1</sub> = 0.0367,<br><i>wR</i> <sub>2</sub> = 0.0869            | <i>R</i> <sub>1</sub> = 0.0300,<br><i>wR</i> <sub>2</sub> = 0.0676            | <i>R</i> <sub>1</sub> = 0.0296,<br><i>wR</i> <sub>2</sub> = 0.0673            | <i>R</i> <sub>1</sub> = 0.0452,<br><i>wR</i> <sub>2</sub> = 0.0943            |
| <i>R</i> indices (all data) <sup>c)</sup>                         | <i>R</i> <sub>1</sub> = 0.0525,<br><i>wR</i> <sub>2</sub> = 0.0943            | <i>R</i> <sub>1</sub> = 0.0397,<br><i>wR</i> <sub>2</sub> = 0.0706            | <i>R</i> <sub>1</sub> = 0.0420,<br><i>wR</i> <sub>2</sub> = 0.0715            | <i>R</i> <sub>1</sub> = 0.0708,<br><i>wR</i> <sub>2</sub> = 0.1033            |
| Largest diff. peak/hole (e·Å <sup>-3</sup> )                      | 0.493 / -0.542                                                                | 0.380 / -0.240                                                                | 0.336 / -0.279                                                                | 0.581 / -0.379                                                                |

<sup>a)</sup> $R_{\text{int}} = \sum |F_0^2 - F_0^2(\text{mean})| / \sum F_0^2$ , where  $F_0^2$  (mean) is the average intensity of symmetry equivalent diffractions. <sup>b)</sup> $S = [\sum w (F_0^2 - F_0^2)^2] / (n-p)^{1/2}$ , where *n* = number of reflections, *p* = number of parameters. <sup>c)</sup> $R = [\sum (||F_0| - |F_0||) / \sum |F_0|]$ ;  $R[\sum (w(F_0^2 - F_0^2))^2 / \sum (wF_0^4)]^{1/2}$ .

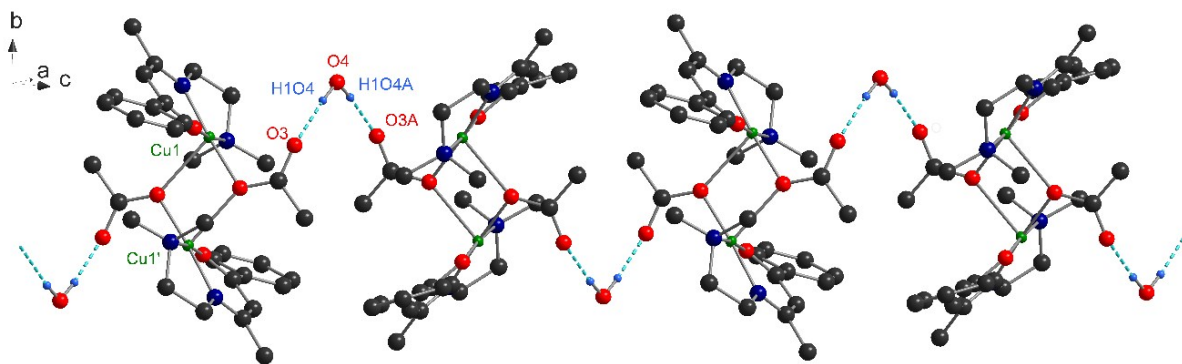

**Figure S1.** The 1D chains formed by **4b** in the solid state, due to hydrogen bond formation, indicated as dotted lines. All carbon-bonded hydrogen atoms are omitted for clarity. O3...O4 2.820(2) Å, H1O4–O4 0.87(2), O3...H1O4 1.95 (3), O3...H1O4–O4 173.8(19)°. Symmetry code  $-x + 1, -y, -z + 1$ .

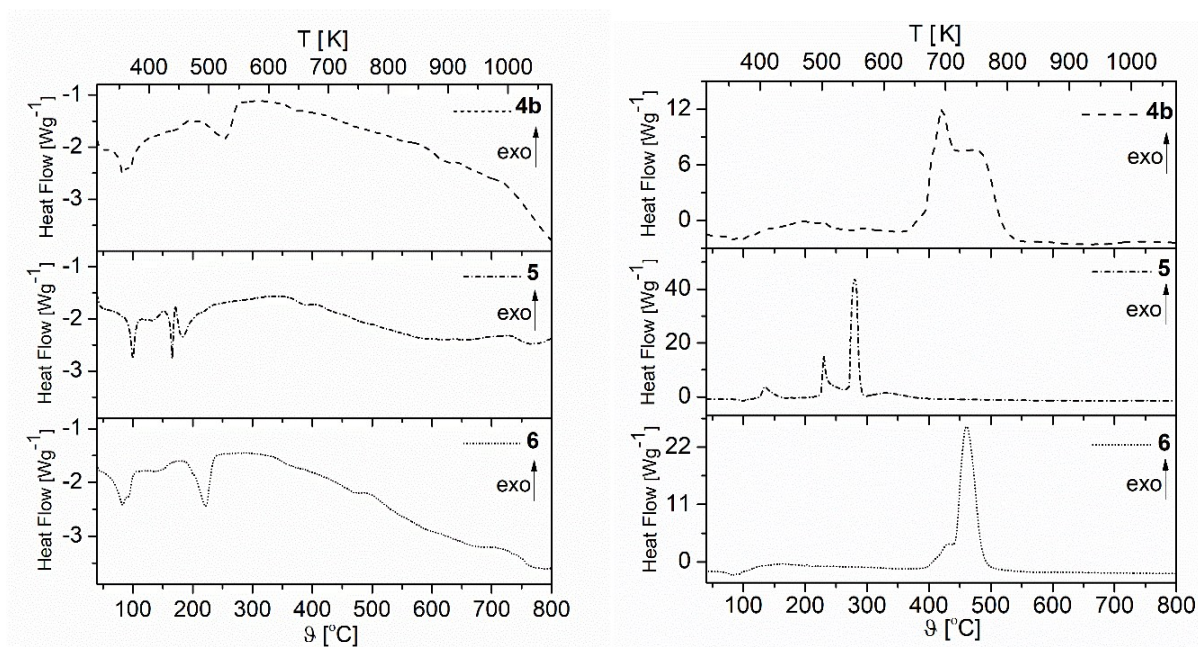

**Figure S2.** DSC traces of **4b**, **5**, and **6** under argon (left) (gas flow, 20 mL min<sup>-1</sup>) and oxygen (right) (gas flow, 20 mL min<sup>-1</sup>; argon carrier gas flow, 40 mL min<sup>-1</sup>) (heating rate 10 °C min<sup>-1</sup>).

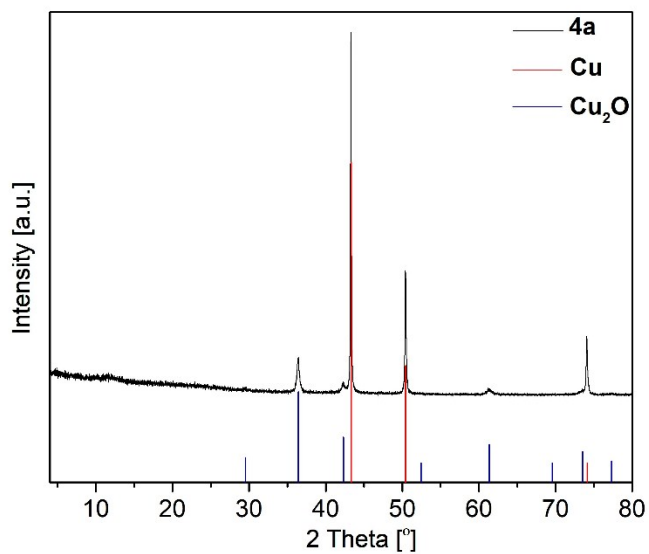

**Figure S3.** PXRD pattern of the TG residues obtained from **4a** under argon, for comparison Cu (ICDD 00-04-0836) Cu and Cu<sub>2</sub>O (ICDD 00-005-0667).

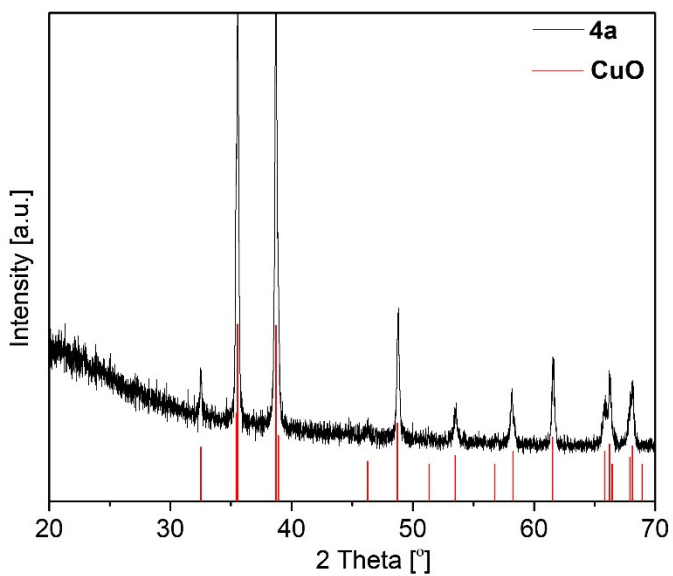

**Figure S4.** PXRD pattern of the TG residues obtained from **4a** under oxygen, for comparison CuO (ICDD 01-073-6023).

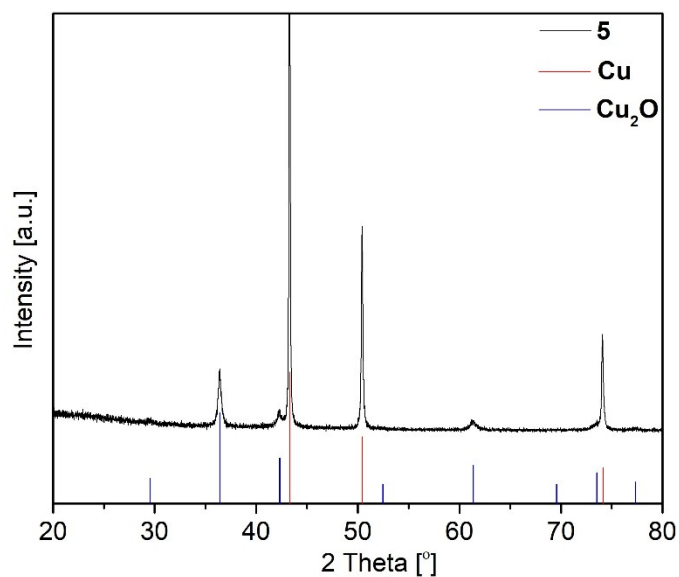

**Figure S5.** PXRD pattern of the TG residues obtained from **5** under argon, for comparison Cu (ICDD 00-04-0836) and Cu<sub>2</sub>O (ICDD 00-005-0667).

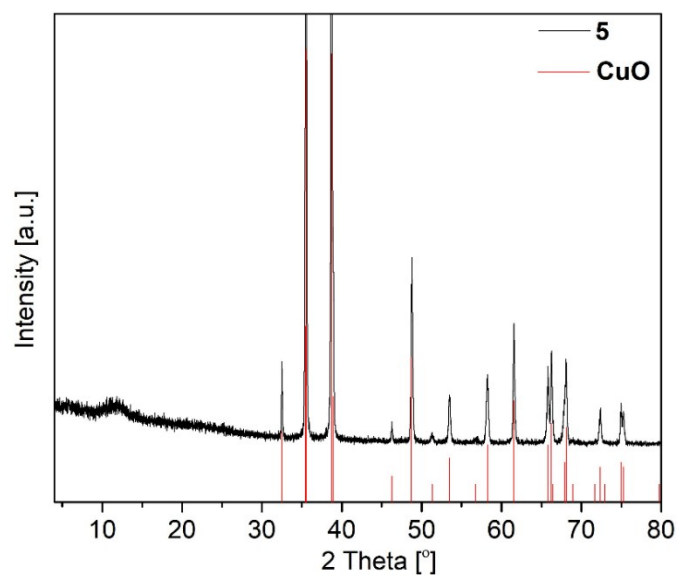

**Figure S6.** PXRD pattern of the TG residues obtained from **5** under oxygen, for comparison CuO (ICDD 01-073-6023).

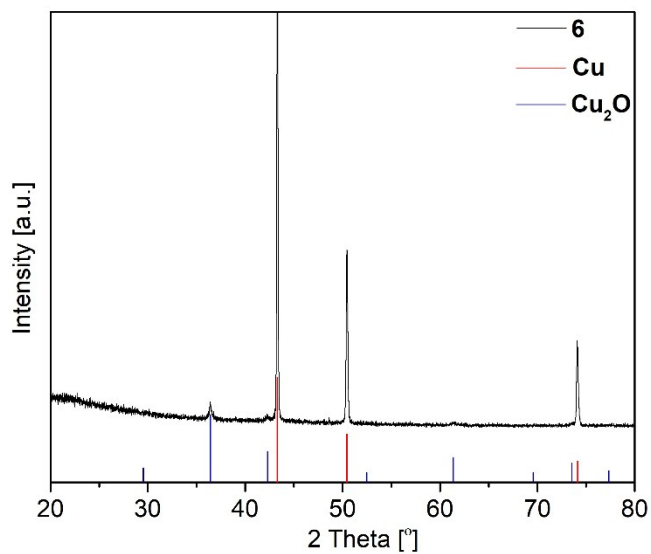

**Figure S7.** PXRD pattern of the TG residues obtained from **6** under argon, for comparison Cu (ICDD 00-04-0836) and Cu<sub>2</sub>O (ICDD 00-005-0667).

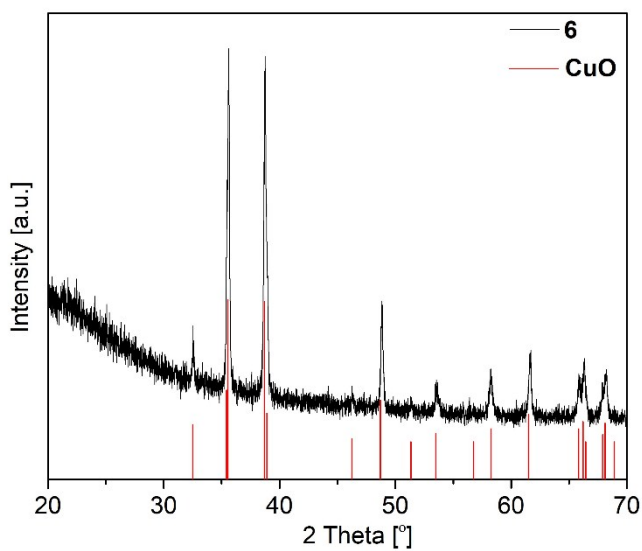

**Figure S8.** PXRD pattern of the TG residues obtained from **6** under oxygen, for comparison CuO (ICDD 01-073-6023).

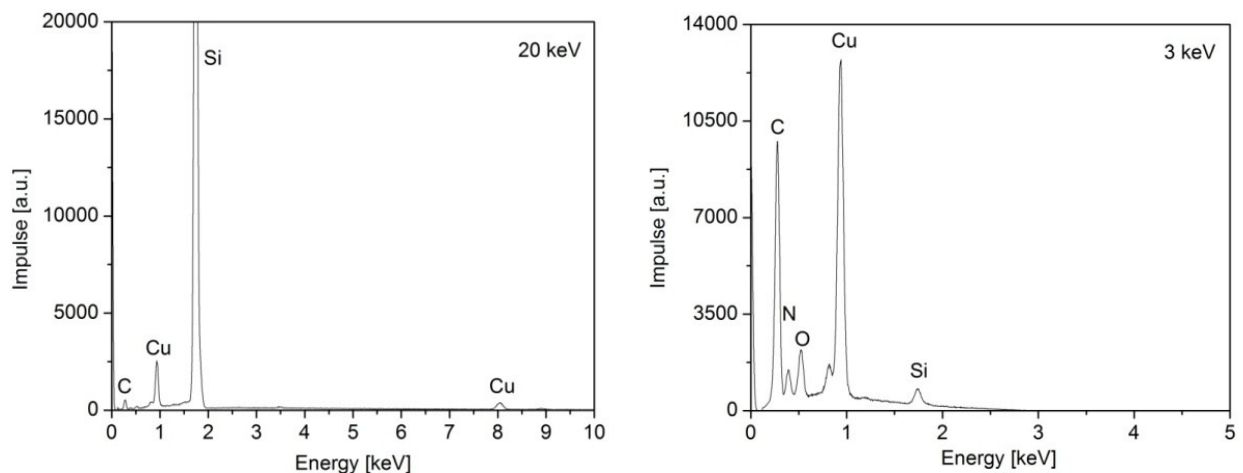

**Figure S9.** EDX spectra of the films obtained by using **4a** as CVD precursor (layer A) ( $\text{N}_2$ ) (gas flow rate  $50 \text{ mL min}^{-1}$ , at 20 keV (left) and 3 keV (right), substrate temperature  $450^\circ\text{C}$ ).

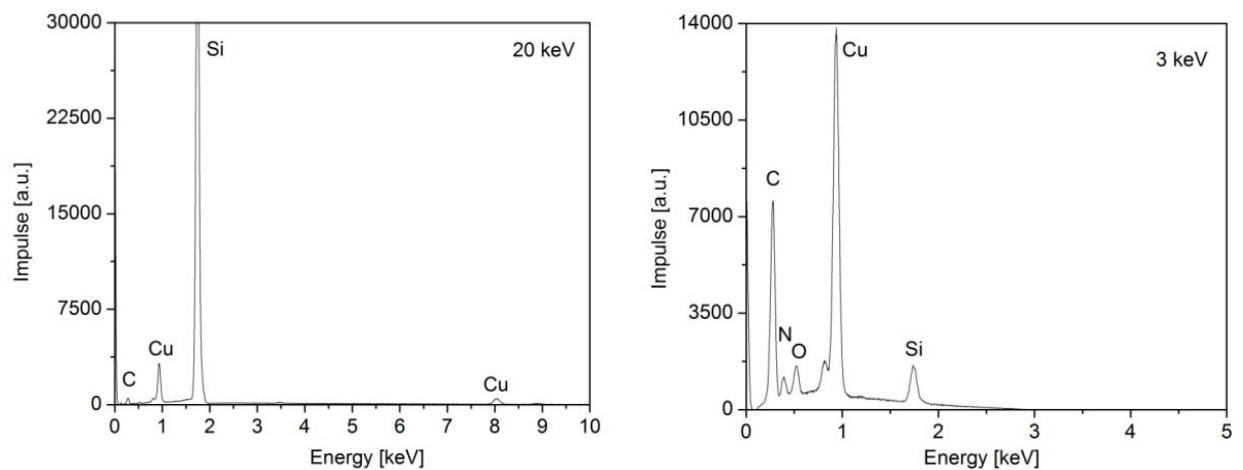

**Figure S10.** EDX spectra of the films obtained by using **4a** as CVD precursor (layer B) ( $\text{N}_2$ ) (gas flow rate  $50 \text{ mL min}^{-1}$ , at 20 keV (left) and 3 keV (right), substrate temperature  $510^\circ\text{C}$ ).

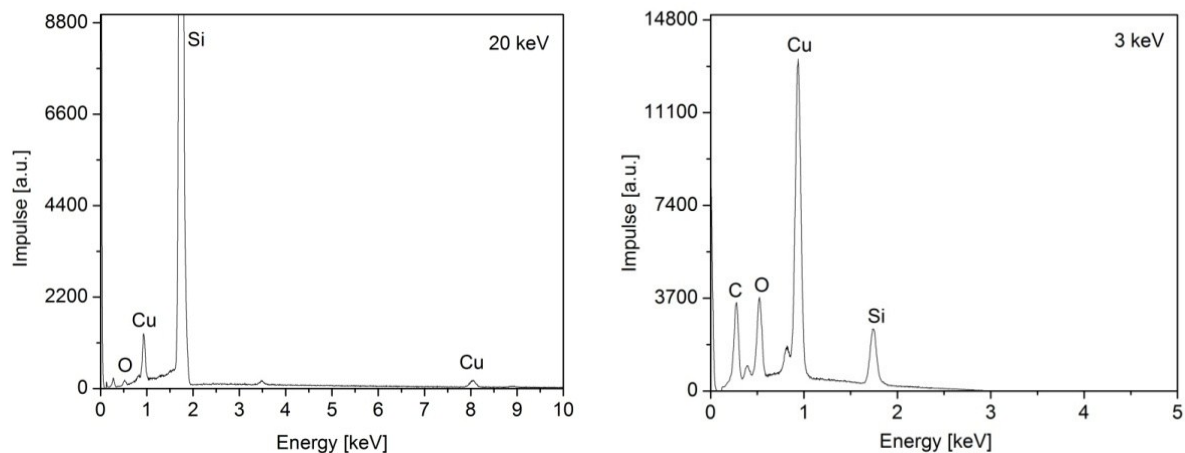

**Figure S11.** EDX spectra of the films obtained by using **5** as CVD precursor (layer C) ( $N_2$ ) (gas flow rate  $50\text{ mL min}^{-1}$ , at 20 keV (left) and 3 keV (right), substrate temperature  $450\text{ }^\circ\text{C}$ ) for comparison.

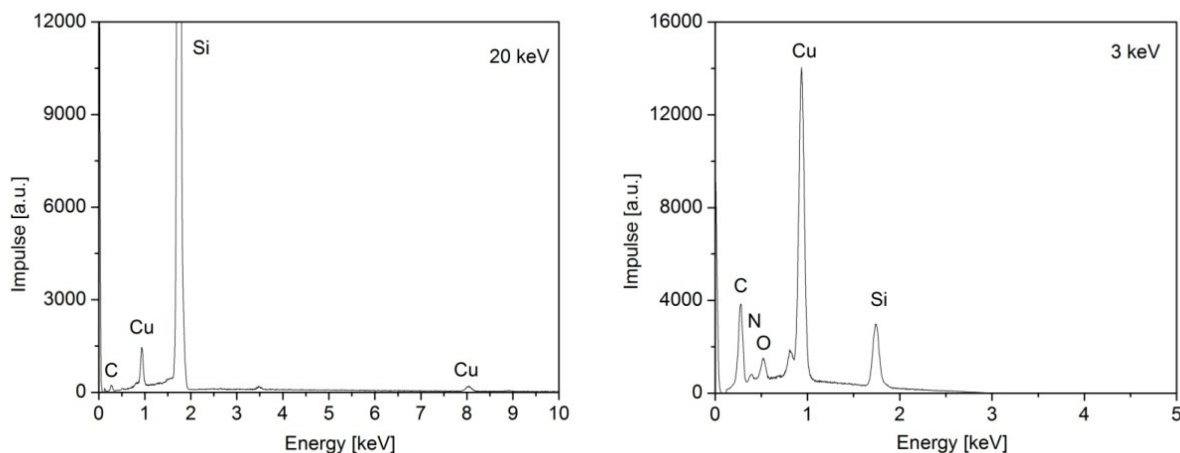

**Figure S12.** EDX spectra of the films obtained by using **5** as CVD precursor (layer D) ( $N_2$ ) (gas flow rate  $50\text{ mL min}^{-1}$ , at 20 keV (left) and 3 keV (right), substrate temperature  $510\text{ }^\circ\text{C}$ ).

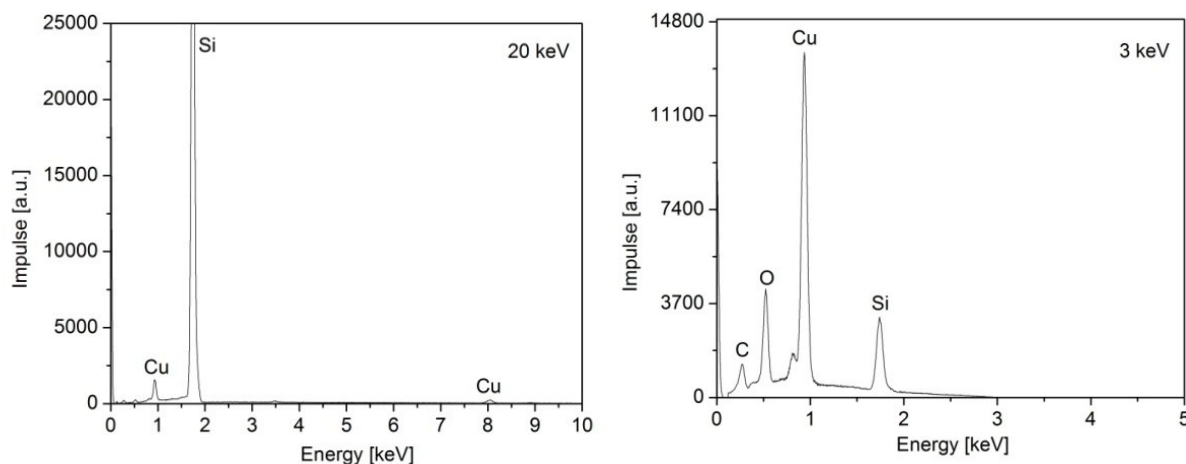

**Figure S13.** EDX spectra of the films obtained by using **4a** as CVD precursor (layer E) ( $O_2$ ) (gas flow rate  $40\text{ mL min}^{-1}$ , at 20 keV (left) and 3 keV (right), substrate temperature  $450\text{ }^\circ\text{C}$ ) for comparison.

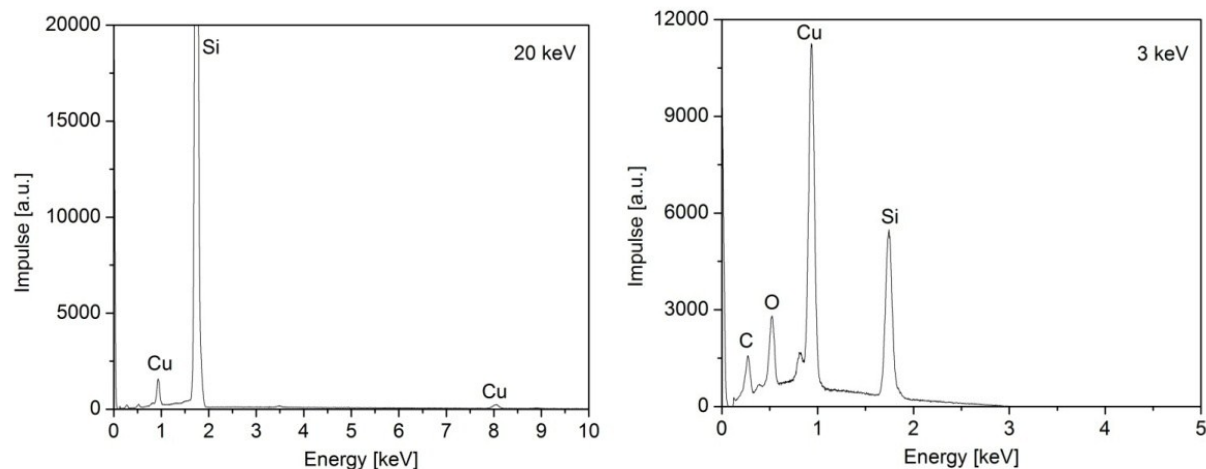

**Figure S14.** EDX spectra of the films obtained by using **4a** as CVD precursor (layer F) ( $O_2$ ) (gas flow rate  $40 \text{ mL min}^{-1}$ , at 20 keV (left) and 3 keV (right), substrate temperature  $510^\circ\text{C}$ ).

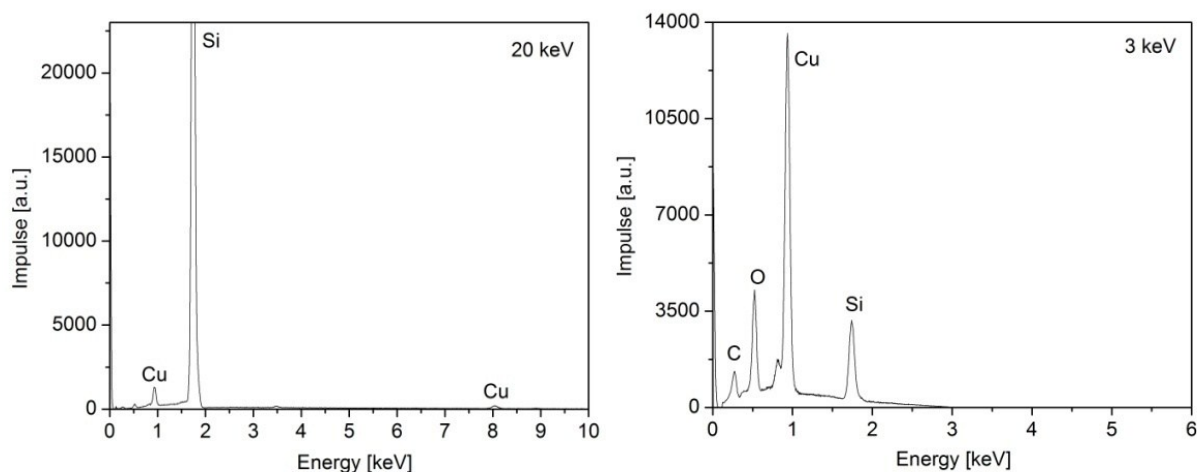

**Figure S15.** EDX spectra of the film obtained by using **5** as CVD precursor (layer H) ( $O_2$ ) (gas flow rate  $40 \text{ mL min}^{-1}$ , at 20 keV (left) and 3 keV (right), substrate temperature  $510^\circ\text{C}$ ).

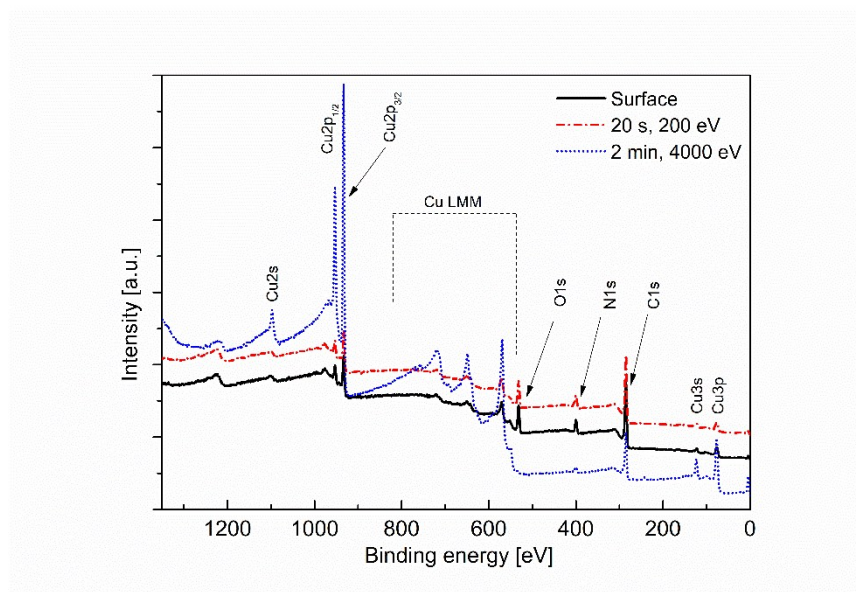

**Figure S16.** Detailed XPS spectra obtained of layer A (applied parameters are given in Table 4) of the surface and layer after 20 s (200 eV) and 2 min argon ion sputtering ( $E = 4000 \text{ eV}$ ).

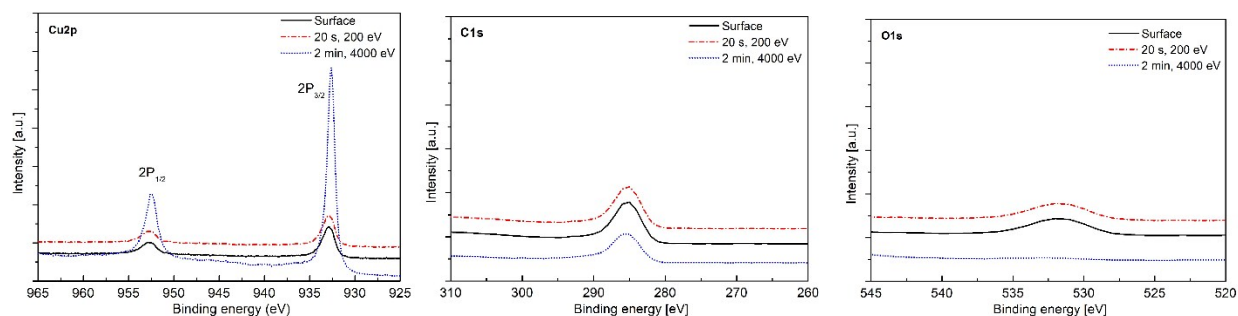

**Figure S17.** Detailed XPS spectra of the Cu2p (left) peak, C1s (middle) and O1s (right) obtained of layer A from **4a** of the surface and layer after 20 s (200 eV) and 2 min argon ion sputtering ( $E = 4000$  eV).

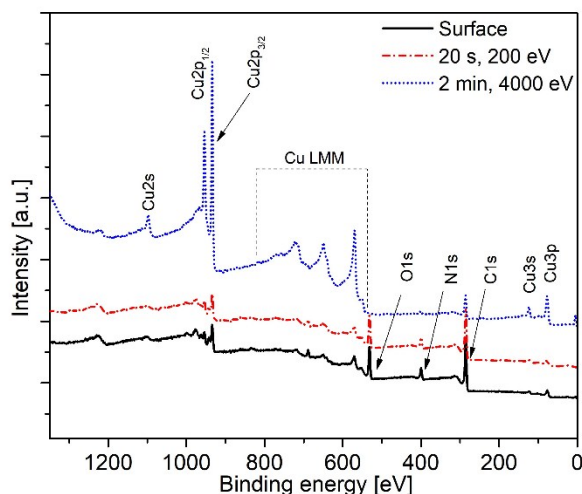

**Figure S18.** XPS survey spectra obtained of layer B (applied parameters are given in Table 4) of the surface and layer after 20 s (200 eV) and 2 min argon ion sputtering ( $E = 4000$  eV).

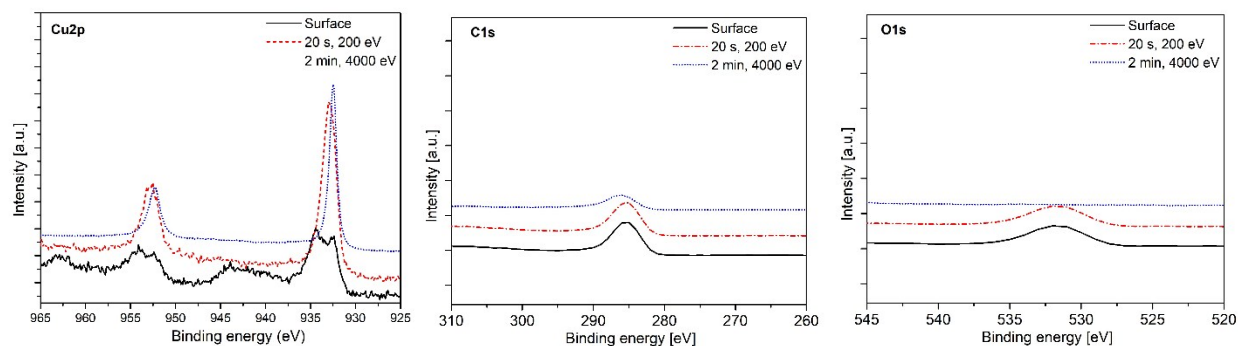

**Figure S19.** Detailed XPS spectra of the Cu2p (left) peak, C1s (middle) and O1s (right) obtained of layer B from **5** of the surface and layer after 20 s (200 eV) and 2 min argon ion sputtering ( $E = 4000$  eV).

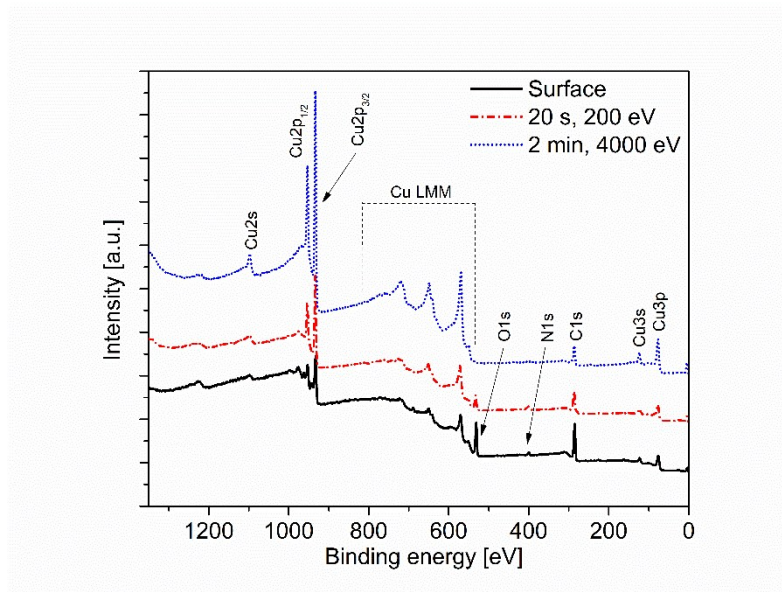

**Figure S20.** XPS survey spectra obtained of layer C (applied parameters are given in Table 4) of the surface and layer after 20 s (200 eV) and 2 min argon ion sputtering ( $E = 4000$  eV).

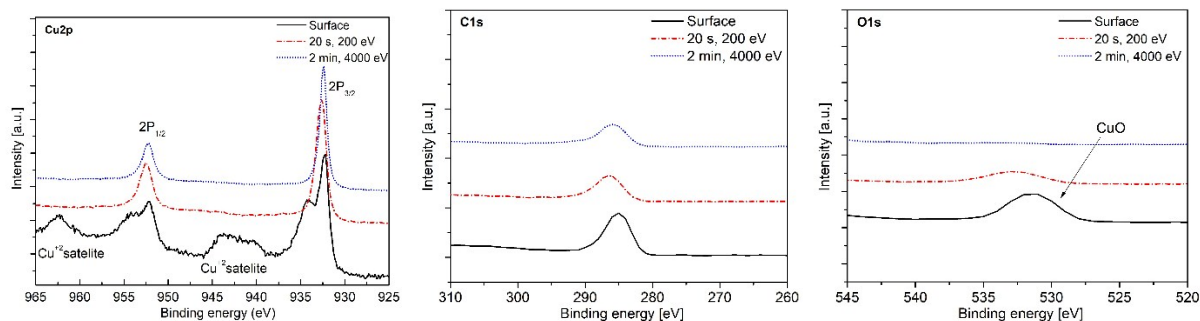

**Figure S21.** Detailed XPS spectra of the Cu2p (left) peak, C1s (middle) and O1s (right) obtained of layer C from **5** of the surface and layer after 20 s (200 eV) and 2 min argon ion sputtering ( $E = 4000$  eV).

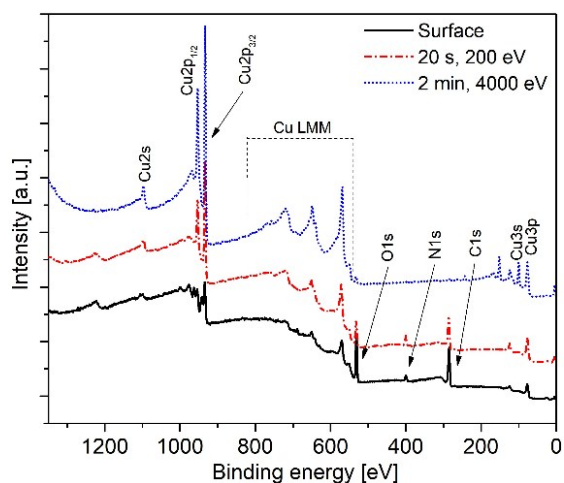

**Figure S22.** XPS survey spectra obtained of layer E (applied parameters are given in Table 4) of the surface and layer after 20 s (200 eV) and 2 min argon ion sputtering ( $E = 4000$  eV).

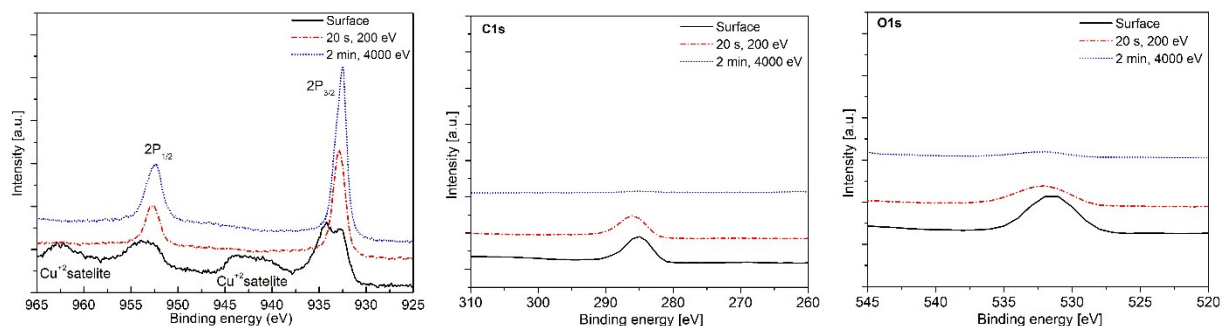

**Figure S23.** Detailed XPS spectra of the Cu2p (left) peak, C1s (middle) and O1s (right) obtained of layer E from 5 of the surface and layer after 20 s (200 eV) and 2 min argon ion sputtering ( $E = 4000$  eV).

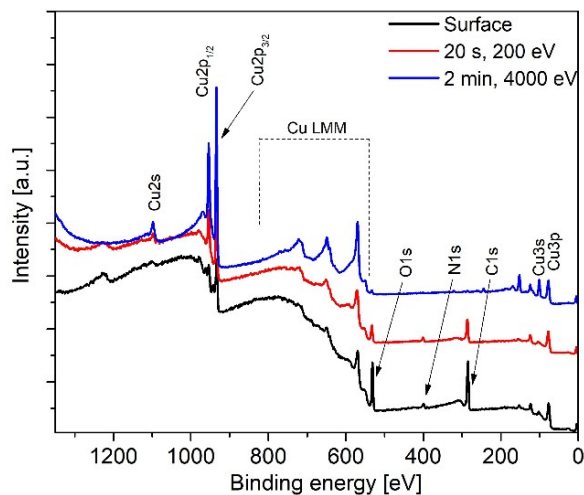

**Figure S24.** XPS survey spectra obtained of layer F (applied parameters are given in Table 5) of the surface and layer after 20 s (200 eV) and 2 min argon ion sputtering ( $E = 4000$  eV).

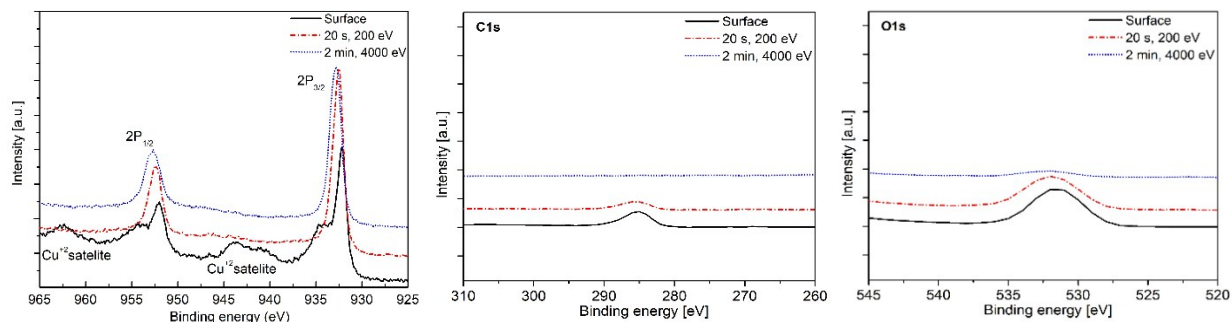

**Figure S25.** Detailed XPS spectra of the Cu2p (left) peak, C1s (middle) and O1s (right) obtained of layer F from 5 of the surface and layer after 20 s (200 eV) and 2 min argon ion sputtering ( $E = 4000$  eV).

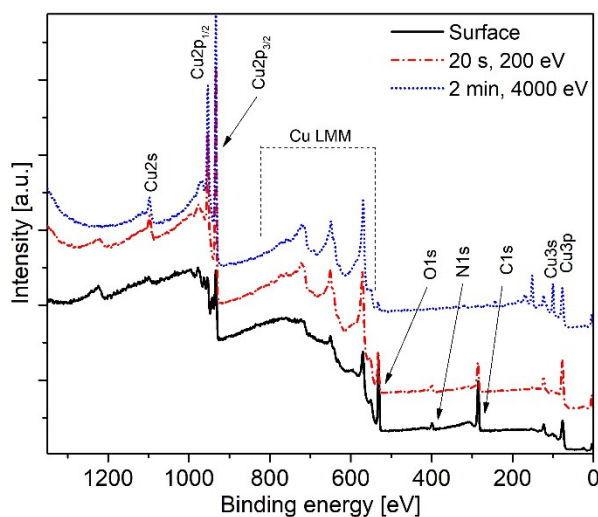

**Figure S26.** XPS survey spectra obtained of layer G (applied parameters are given in Table 4) of the surface and layer after 20 s (200 eV) and 2 min argon ion sputtering ( $E = 4000$  eV).

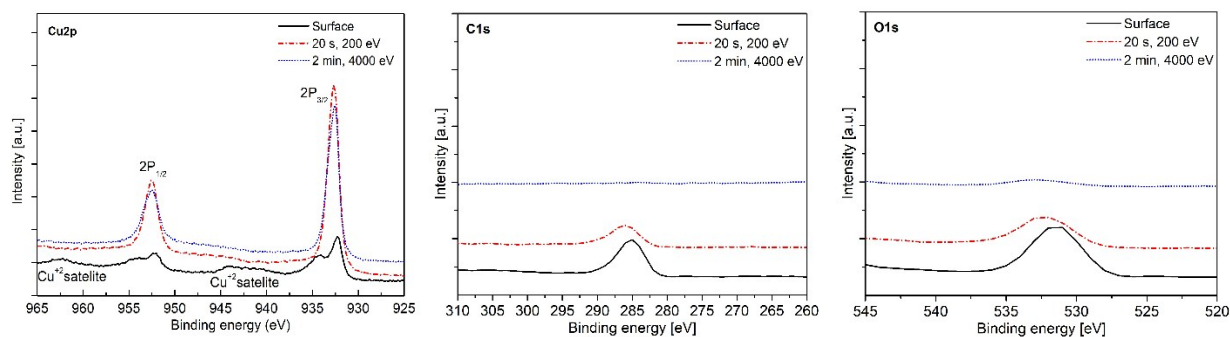

**Figure S27.** Detailed XPS spectra of the Cu2p (left) peak C1s (middle) and O1s (right) obtained of layer G from **5** of the surface and layer after 20 s (200 eV) and 2 min argon ion sputtering (E = 4000 eV).

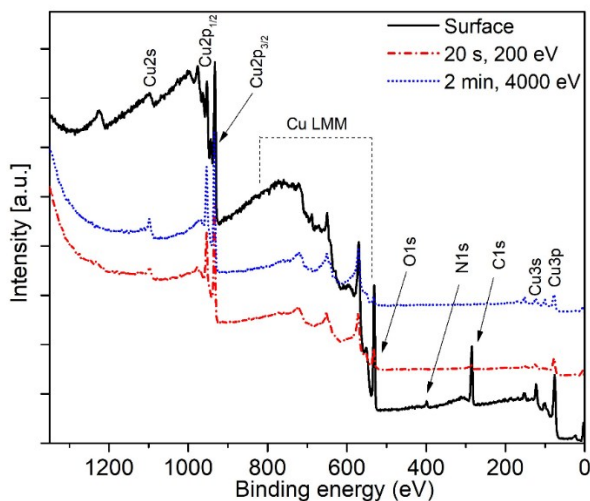

**Figure S28.** XPS survey spectra obtained of layer H (applied parameters are given in Table 5) of the surface and layer after 20 s (200 eV) and 2 min argon ion sputtering (E = 4000 eV).

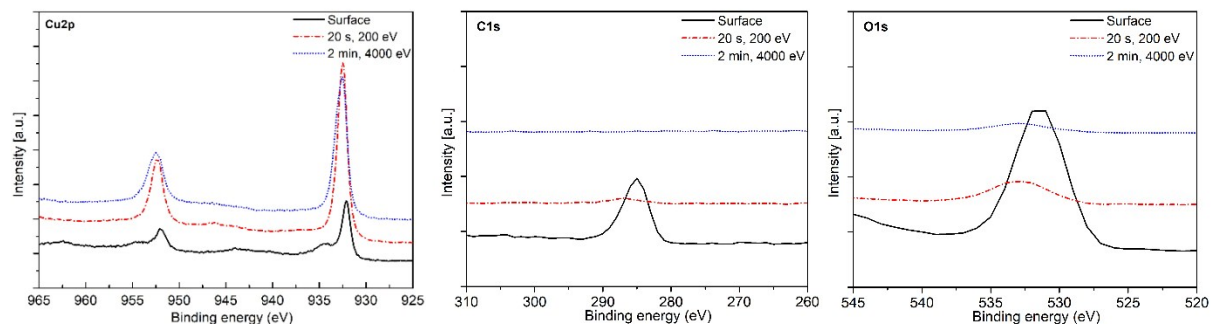

**Figure S29.** Detailed XPS spectra of the Cu2p (left) peak C1s (middle) and O1s (right) obtained of layer H from **5** of the surface and layer after 20 s (200 eV) and 2 min argon ion sputtering (E = 4000 eV).

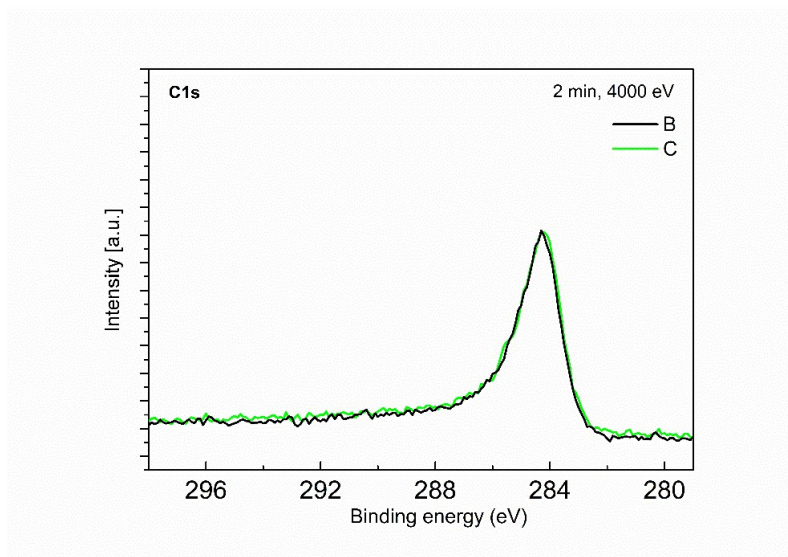

**Figure S30.** Detailed XPS spectra of the C1s obtained of layers B and C of the layer after 2 min argon ion sputtering ( $E = 4000$  eV).

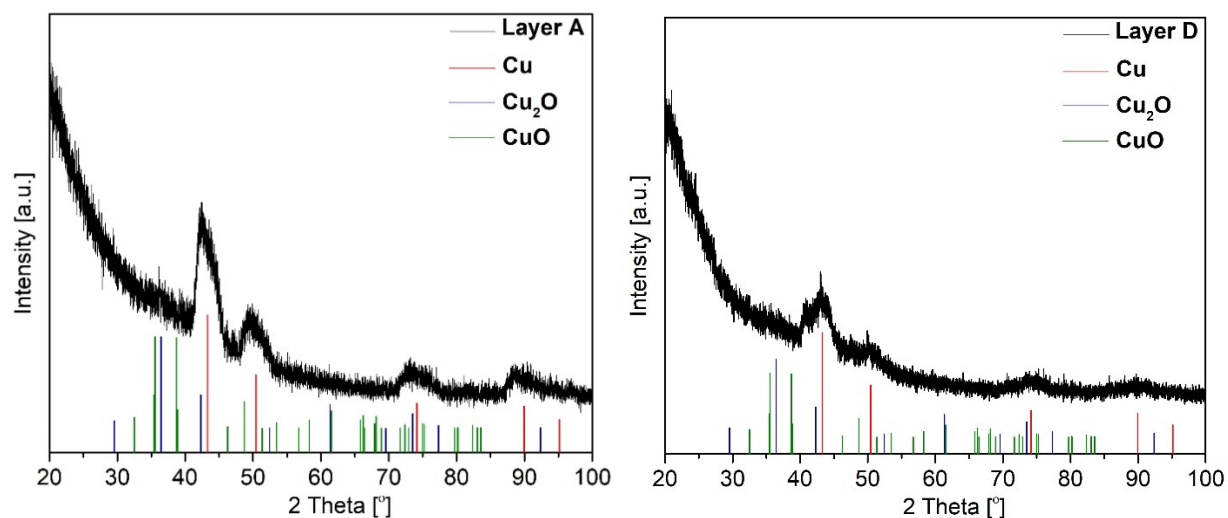

**Figure S31.** PXRD pattern of the layer A (left) from **4a** and layer D (right) from **5** CVD ( $N_2$ ) (applied deposition parameters are given in Table 4).

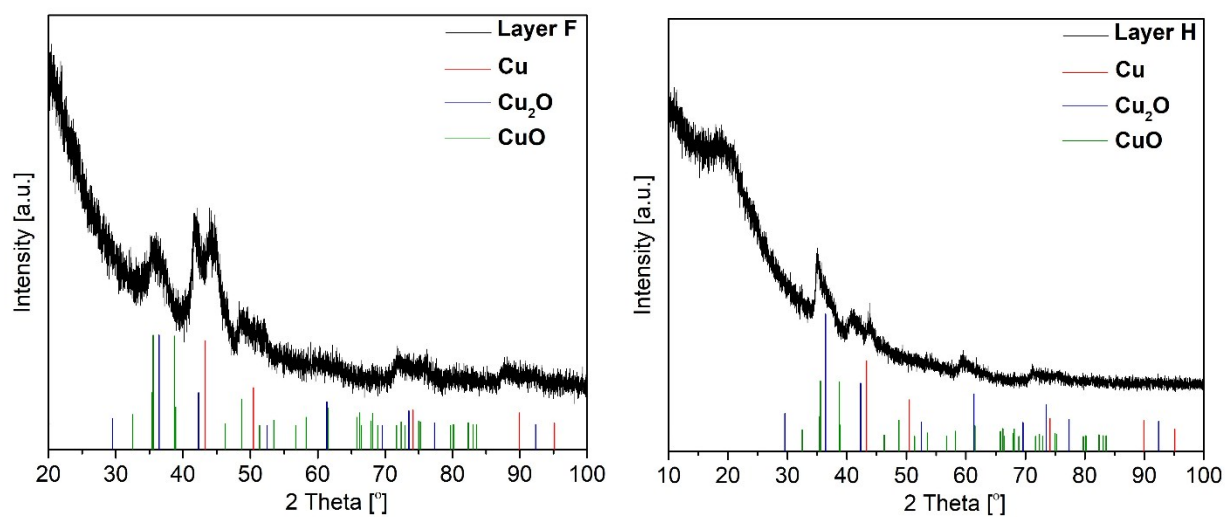

**Figure S32.** PXRD pattern of the layer F (left) from **4a** and layer H (right) from **5** by CVD (O<sub>2</sub>) (applied deposition parameters are given in Table 4).
